# Supplementary material
Source: Royal Society of Chemistry journal article supplement (doi:10.1039/d6qi00467a)
Supplement: d6qi00467a1.pdf [file d6qi00467a1.pdf]

## **Self-reduced Co-TiO<sub>2</sub> photocatalysts for peroxymonosulfate activation: efficient ciprofloxacin degradation and dynamic charge transfer**

Shuzhe Zhang<sup>1a</sup>, He Wang<sup>1a</sup>, Gang Chen<sup>b</sup>, He Zheng<sup>c</sup>, Yanhua Song<sup>a</sup>, and Haifeng Zou<sup>\*a</sup>

<sup>a</sup> Department of Chemical Engineering and Applied Chemistry, College of Chemistry, Jilin University, Qianjin Street 2699, Changchun 130012, China.

<sup>b</sup> State Key Laboratory of Supramolecular Structure and Materials, College of Chemistry, Jilin University, Changchun 130012, China.

<sup>c</sup> State Key Laboratory of Inorganic Synthesis and Preparative Chemistry College of Chemistry Jilin University, Changchun 130012, China.

### **Corresponding Author:**

\*E-mail: [haifengzou0431@sohu.com](mailto:haifengzou0431@sohu.com)

<sup>1</sup> These authors contributed equally to this work.

### **Materials**

All chemicals were not further purified. Isopropyl titanate (TTIP), Co(NO<sub>3</sub>)<sub>2</sub>·2H<sub>2</sub>O, KSHO<sub>5</sub> and Na<sub>2</sub>CO<sub>3</sub> were purchased from Macklin Biochemical Co., Ltd. Cetyltrimethylammonium bromide (CTAB) and hydrofluoric acid (HF) was supplied by national pharmaceutical reagents Co., Ltd. Ethylene glycol (EG) was obtained from Tianjin Tiantai Chemical Co., Ltd.

### **Characterizations**

The structural and morphological features of the synthesized catalysts were systematically characterized using advanced analytical techniques. Field-emission scanning electron microscopy (FE-SEM, Hitachi S4800) and high-resolution transmission electron microscopy (HR-TEM, Tecnai F20) were employed to visualize the surface topography and structural details. The crystalline phases were identified by

powder X-ray diffraction (XRD, DX-2700) measurements conducted at room temperature. Surface chemical composition and electronic states were analyzed using X-ray photoelectron spectroscopy (XPS, VG ESCALAB 250), while electron spin resonance spectroscopy (ESR, JEOL JES-FA 200) was utilized to investigate defect states. The porous texture and specific surface area were determined through nitrogen adsorption-desorption experiments performed on a Micromeritics ASAP 2020HD88 analyzer. Optical absorption characteristics were studied via UV-vis-NIR spectroscopy (PerkinElmer Lambda 950), and charge carrier recombination behavior was assessed using photoluminescence spectroscopy (Edinburgh Instruments FLS 1000). Additionally, photoelectrochemical properties were examined with a CH Instruments 660e electrochemical workstation configured in a standard three-electrode setup.

### Photocatalytic Performance Evaluation

The photocatalytic reduction of CIP was investigated using an aqueous CIP solution (20 mg/L, 50 mL) containing 20 mg of catalyst. Prior to illumination, the suspension was magnetically stirred in darkness for 30 min to achieve adsorption-desorption equilibrium. Subsequently, 5 mg of PMS was added to the solution. During simulated solar irradiation, reaction aliquots (1 mL) were collected at regular time intervals and immediately centrifuged to separate catalyst particles. And then analyzed by UV-vis spectroscopy to track degradation kinetics ( $\lambda_{\text{max}} = 335 \text{ nm}$ ).

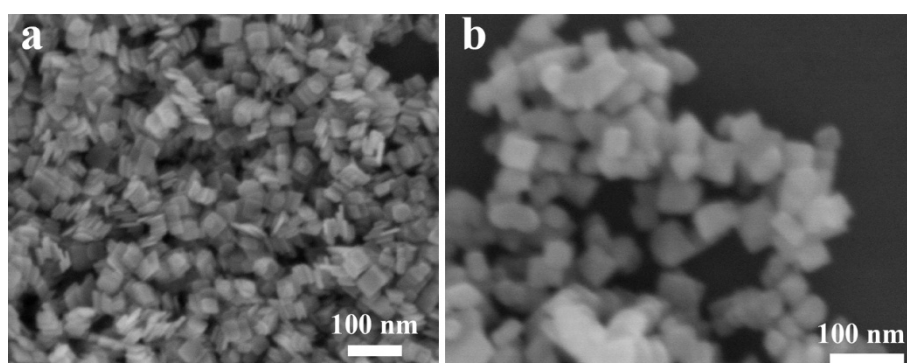

**Fig. S1.** SEM images of (a)TO and (b) CoBTO

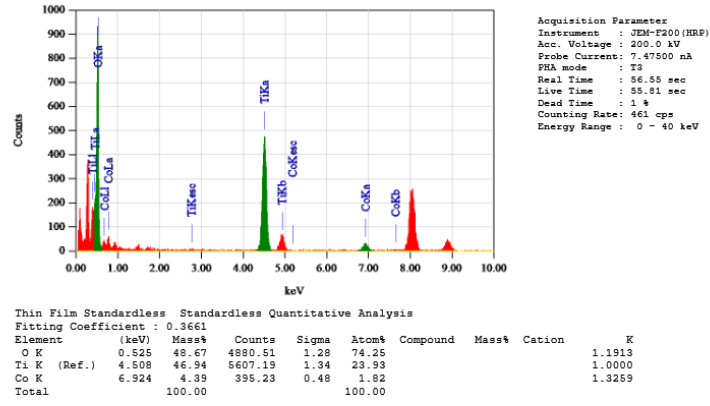

**Fig. S2.** TEM mapping diagram and atomic ratio of CoTO

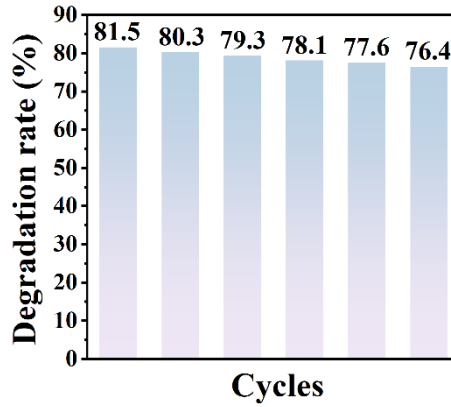

**Fig. S3.** Cyclic degradation efficiency of CoTO

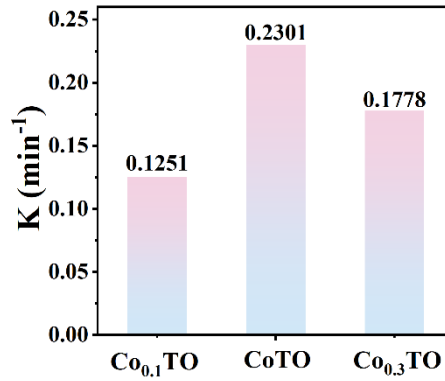

**Fig. S4.** Photocatalytic degradation efficiency of CIP over samples with different Co doping concentrations

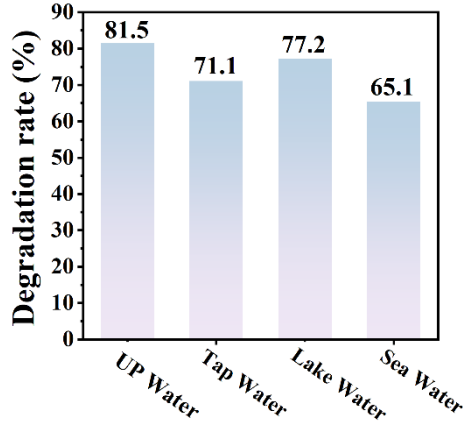

Fig. S5. CIP degradation efficiency by the Vis/CoTO/PMS system in various water matrices

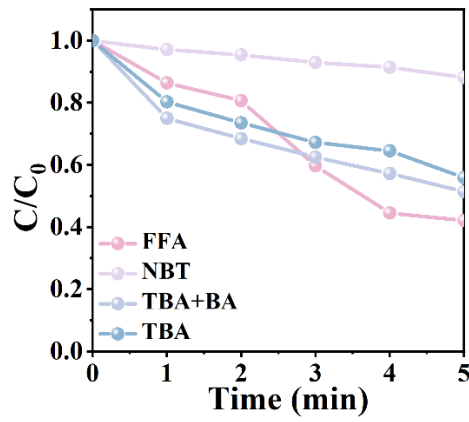

Fig. S6. Consumption kinetics of chemical probes in the Vis/CoTO/PMS system for CIP degradation

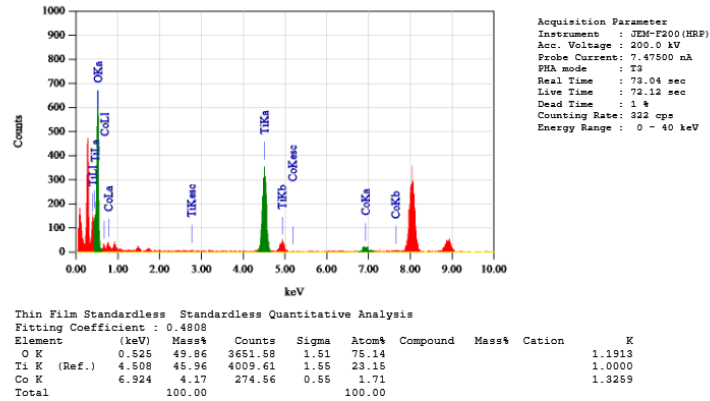

Fig. S7. TEM mapping diagram and atomic ratio of CoTO after the cycles

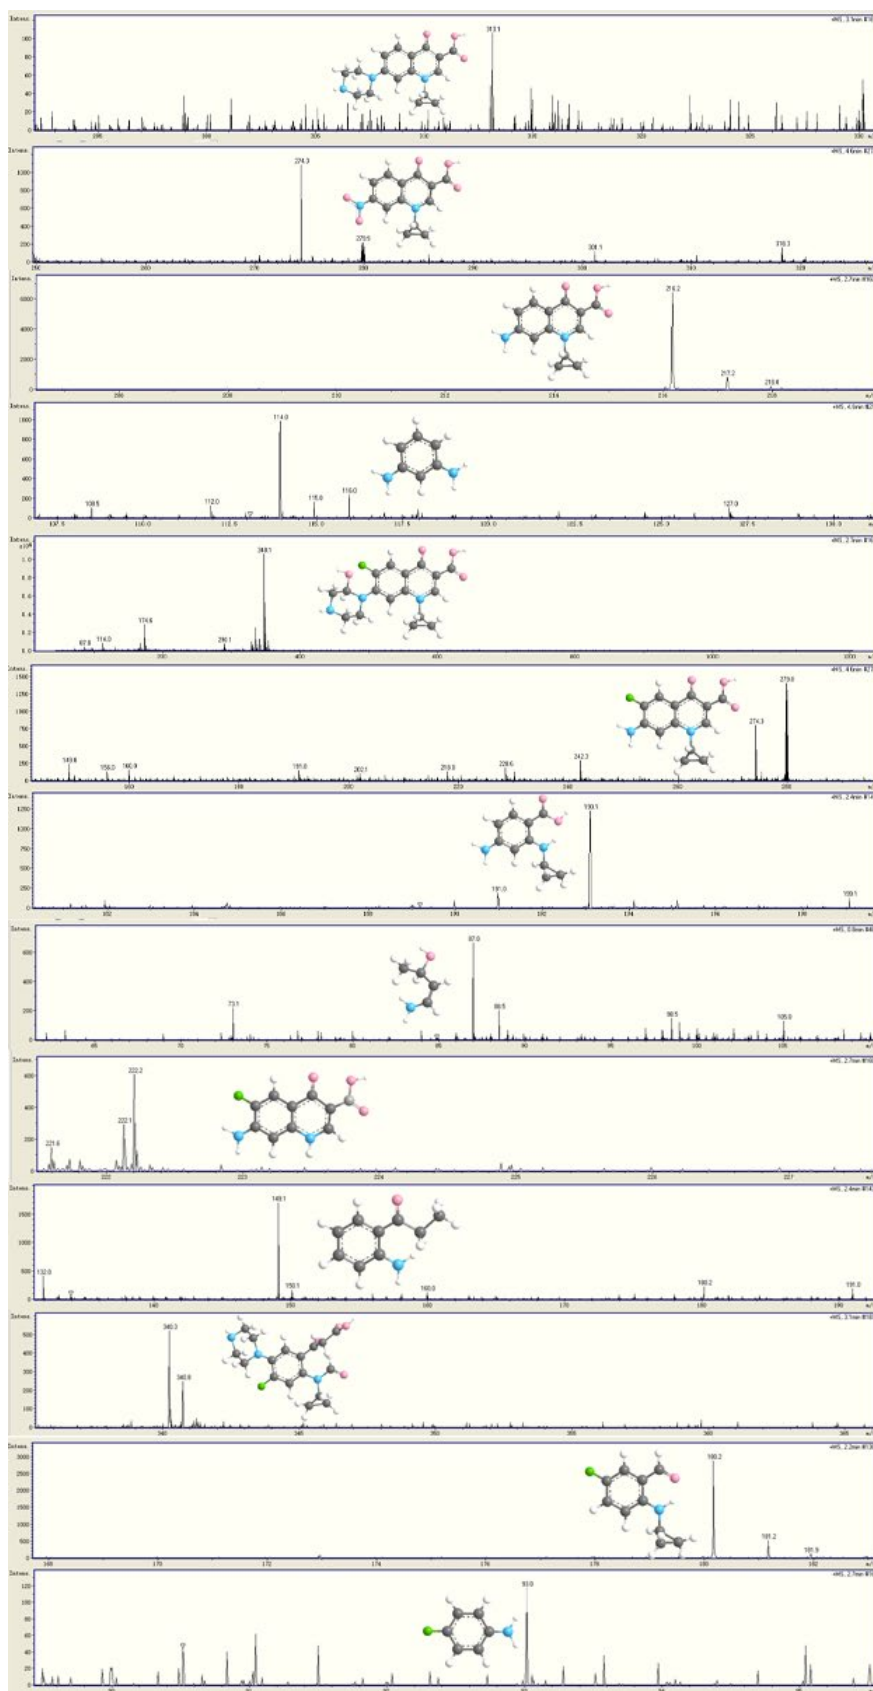

**Fig. S8.** LC-MS analysis of CIP during its degradation process

**Table S1.** Comparison of photodegradation performance of CIP by various photocatalysts

| Catalyst                          | Catalyst Conc. (g/L) | Catalyst Conc. (g/L) | CIP Conc. (mg/L) | Degradation efficiency (%) | Time (min) | Ref.             |
|-----------------------------------|----------------------|----------------------|------------------|----------------------------|------------|------------------|
| <b>CoTO</b>                       | <b>0.4</b>           | <b>0.1</b>           | <b>20</b>        | <b>81.5</b>                | <b>5</b>   | <b>This work</b> |
| $\beta$ -CD-CoWO <sub>4</sub> 350 | 0.2                  | 0.13                 | 20               | 80.9                       | 60         | 1                |
| LFPBC <sub>0.5</sub>              | 1.0                  | 0.51                 | 10               | 89.8                       | 90         | 2                |
| S3                                | 0.6                  | 1.0                  | 20               | 82.6                       | 30         | 3                |
| BOF-5                             | 0.6                  | 0.6                  | 10               | 70.0                       | 30         | 4                |
| MnO <sub>2</sub> /CuO-0.3         | 0.1                  | 0.1                  | 10               | 66.1                       | 6          | 5                |
| MX/Cu-G-CN                        | 0.5                  | 1.27                 | 10               | 88.8                       | 150        | 6                |

**Table S2.** Relative contribution of various reactive species to CIP photodegradation

| Reactive species              | Scavenger          | Inhibition rate (%) | Relative contribution (%) |
|-------------------------------|--------------------|---------------------|---------------------------|
| h <sup>+</sup>                | EDTA-2Na           | 52.5                | 24.2                      |
| SO <sub>4</sub> <sup>•-</sup> | EtOH               | 51.0                | 23.5                      |
| <sup>1</sup> O <sub>2</sub>   | L-H                | 46.6                | 21.4                      |
| •O <sub>2</sub> <sup>-</sup>  | CH <sub>3</sub> Cl | 39.7                | 18.3                      |
| e <sup>-</sup>                | KBrO <sub>3</sub>  | 12.1                | 5.6                       |
| •OH                           | IPA                | 15.4                | 7.1                       |

**Table S3.** The second-order reaction rate constants of probes, quenchers and deprotonated organics with ROS

|     | •OH (M <sup>-1</sup> ·s <sup>-1</sup> ) | SO <sub>4</sub> <sup>•-</sup> (M <sup>-1</sup> ·s <sup>-1</sup> ) | <sup>1</sup> O <sub>2</sub> (M <sup>-1</sup> ·s <sup>-1</sup> ) | O <sub>2</sub> <sup>•-</sup> (M <sup>-1</sup> ·s <sup>-1</sup> ) |
|-----|-----------------------------------------|-------------------------------------------------------------------|-----------------------------------------------------------------|------------------------------------------------------------------|
| TBA | 6.0 × 10 <sup>8</sup>                   | 4.0 × 10 <sup>5</sup>                                             | 3.04 × 10 <sup>3</sup>                                          | -                                                                |
| FFA | 1.5 × 10 <sup>10</sup>                  | -                                                                 | 1.2 × 10 <sup>8</sup>                                           | -                                                                |
| BA  | 5.9 × 10 <sup>9</sup>                   | 1.2 × 10 <sup>9</sup>                                             | -                                                               | -                                                                |
| NBT | 1.9 × 10 <sup>9</sup>                   | -                                                                 | -                                                               | 5.9 × 10 <sup>4</sup>                                            |

**Table S4.** ICP-OES analysis of the solution after the cycles

|      | Co    | Ti      |
|------|-------|---------|
| CoTO | 0.43% | 0.0008% |

**References**

1. G. Zhang, X. Fan, H. Chen, Z. Li, H. Lei, G. Chen, N. Fu and X. Ren,  $\beta$ -cyclodextrin-modified cobalt tungstate with abundant nanoconfined channels activating peroxymonosulfate for Ciprofloxacin degradation: Performance optimization and mechanism study, *Colloids and Surfaces A: Physicochemical and Engineering Aspects*, 2026, **740**, 140198.
2. Y. Fu, Y. Yi, W. Chen, Y. Wang, Z. Diao and J. Qi, Unveiling the critical roles of iron and phosphorus in magnetic biochar derived from lithium-extraction residues of retired LiFePO<sub>4</sub> batteries for peroxymonosulfate activation toward ciprofloxacin degradation, *Bioresource Technology*, 2026, **448**, 134324.
3. X. Yu, S. Wang, P. Mo, H. Gao and C. Wang, Charge transfer and PMS activation in high-entropy spinel oxide-based Z-scheme heterojunctions for ciprofloxacin degradation, *Journal of Science: Advanced Materials and Devices*, 2026, **11**, 101100.
4. Y. Zhao, C. Yuan, Y. Yu, X. Zhang, S. Tu, N. Tian and H. Huang, Elucidating charge transfer and radical mechanisms in PMS-activated dot-on-plate Fe<sub>2</sub>O<sub>3</sub>/Bi<sub>12</sub>O<sub>17</sub>Cl<sub>2</sub> heterojunctions for enhanced photocatalysis, *Journal of Colloid and Interface Science*, 2026, **708**, 139774.
5. Y. Tian, W. Sun and G. Zhang, Engineering Mn/Cu bimetallic redox couples and mesoporous architecture for peroxymonosulfate-mediated pollutant removal, *Colloids and Surfaces A: Physicochemical and Engineering Aspects*, 2026, **734**, 139430.
6. Y. Peng, H. Zhang, C. Zhang, Q. Li, C. Yang, Z. Peng, X. Hu, C. Huang, M. Li, J. Deng and C. Tang, Cu single-atom sites boosting peroxymonosulfate activation on MXene/Cu-g-C<sub>3</sub>N<sub>4</sub> for •O<sub>2</sub><sup>-</sup> and <sup>1</sup>O<sub>2</sub> driven antibiotic removal, *Surfaces and Interfaces*, 2026, **80**, 108153.
